1 **First detection and molecular identification of the zoonotic *Anaplasma capra* in**  
2 **deer in France**

3

4 Short title : *Anaplasma capra* in deer in France

5 Maggy Jouglin<sup>1</sup>, Barbara Blanc<sup>2</sup>, Nathalie de la Cotte<sup>1</sup>, Katia Ortiz<sup>2</sup>, Laurence Malandrin<sup>1\*</sup>

6 <sup>1</sup>BIOEPAR, INRA, Oniris, Nantes, France

7 <sup>2</sup>Muséum National d'Histoire Naturelle, Réserve Zoologique de la Haute Touche, Obterre, France

8

9 \*corresponding author : [laurence.malandrin@oniris-nantes.fr](mailto:laurence.malandrin@oniris-nantes.fr) – Current adress : INRA/Oniris, Site  
10 de la Chantrerie, CS40706, UMR BioEpAR, 44307 Nantes cedex 3, France. Tel: +(33)2 40 68 78  
11 57. Fax: +(33)2 40 68 77 51.

12

13 **Abstract**

14 Cervids are known to be reservoir of zoonotic tick-transmitted bacteria. The aim of this study was  
15 to perform a survey in a wild fauna reserve to characterize *Anaplasma* species carried by captive red  
16 deer and swamp deer. Blood from 59 red deer and 7 swamp deer was collected and analyzed over a  
17 period of two years. A semi-nested PCR that targets the 23S rRNA was performed to detect and  
18 characterise *Anaplasma* spp. and determine zoonotic species presence. *Anaplasma phagocytophilum*  
19 was identified in 14/59 deer (23.7%) but not in swamp deer. Few sequences could not be assigned  
20 to any particular species based on the 23S rRNA sequences. Nested PCR targeting *16S* rRNA, *gltA*  
21 and *groEL* genes and sequencing analysis detected a recently reported zoonotic species, *Anaplasma*  
22 *capra* in red deer as well as in swamp deer. This is the first reporting of the tick-borne zoonotic  
23 bacterium *A. capra* in France, a species otherwise described only in China and Japan, in goats,  
24 sheep, deer and japanese serows. Even if this bacterium may have been introduced in the Park with  
25 infected imported animals, its local epidemiological cycle through tick transmission seems possible  
26 as locally born deer were found infected. Diagnostic methods, especially molecular ones, should  
27 take into account the potential infection of animals and humans with this species.

28

29 **Keywords :** *Anaplasma capra*, zoonotic tick-borne bacteria, red deer, swamp deer, 23S rRNA, 16S  
30 rRNA, *groEL*, *gltA*

31

32

33

## 34 **Introduction**

35 Bacteria of the genus *Anaplasma* are obligate intracellular parasites that replicate within the  
36 vacuoles of diverse eukaryotic cells (monocytes, granulocytes, erythrocytes, endothelial cells).  
37 These bacteria are mainly transmitted by ixodid ticks and multiply both in the invertebrate and  
38 vertebrate hosts [1]. The genus *Anaplasma* includes 6 recognized species (*A. phagocytophilum*, *A.*  
39 *bovis*, *A. centrale*, *A. marginale*, *A. ovis* and *A. platys*) responsible for anaplasmosis worldwide on a  
40 large range of wild and domesticated vertebrates [1]. One species, *A. phagocytophilum*, described in  
41 1994 in the USA as the agent of human granulocytic anaplasmosis (HGA), is now increasingly  
42 detected worldwide [1]. In 2015, a second zoonotic and new species, proposed as *A. capra*, was  
43 described in humans in China [2]. On a population of 477 patients with tick-bite history, six percent  
44 (28 patients) were found infected with *A. capra* with non-specific febrile manifestations. Five of  
45 them were hospitalized due to severe symptoms. General clinical features in human patients have  
46 included febrile manifestations (fever, headache, malaise) as well as eschar, lymphadenopathy and  
47 gastrointestinal symptoms [2].

48 Both *A. phagocytophilum* and *A. capra* infect diverse domestic (sheep and goats) and wild  
49 ruminants (deer) species, which are considered as reservoirs. In a survey of tick-borne diseases in  
50 captive and protected deer in France, we investigated the presence of *Anaplasma* species infecting  
51 captive red deer (*Cervus elaphus*) and swamp deer (*Rucervus duvaucelii*). In the “Réserve de la  
52 Haute Touche”, endangered species such as the swamp deer (CITES appendix I) are preserved. This  
53 reserve is surrounded by a large forested and humid area, a biotope favorable to Ixodid ticks,  
54 vectors of *A. phagocytophilum*.

## 55 **Methods**

### 56 *Animal sampling*

57 In 2015, a molecular survey of *Anaplasma* spp. infecting deer was started in the “Réserve de  
58 la Haute Touche” Zoological Park, Indre, France (National Museum of Natural History). Blood

59 samples from 59 red deer and 7 swamp deer were collected between 2015 and 2017. They were  
60 used for molecular detection and characterization of *Anaplasma* spp.. Blood was sampled at the  
61 jugular vein at the occasion of animal care (treatments, vaccinations) or transfers (authorization 36-  
62 145-002).

### 63 *Molecular detection and characterization of Anaplasma spp.*

64 Genomic DNA was extracted from blood according to previously described protocols [3]. We  
65 detected *Anaplasmatatacae* by semi-nested PCR based on the 23S rRNA gene [4] and determined the  
66 species by sequencing PCR positive amplicons. A new detected *Anaplasma* species was further  
67 characterized using nested PCR and sequencing of the 16S rRNA, *gltA* and *groEL* genes (table 1).  
68 Bidirectionnal sequencing was performed to ensure sequences, that were further analyzed by the  
69 BLASTN (<http://www.ncbi.nlm.nih.gov/BLAST/>) and CLUSTAWL  
70 (<https://www.ebi.ac.uk/Tools/msa/clustalo/>) programs.

## 71 **Results**

### 72 *Detection of Anaplasma spp. in deer blood*

73 Of the 66 heparine blood samples from red deer and swamp deer, 23S rRNA amplicons of the right  
74 size were obtained for 28 samples. A BLASTn search of 23S rRNA sequences identified *A.*  
75 *phagocytophilum* in 14 red deer (4/21 in 2015, 7/23 in 2016 and 3/15 in 2017) (prevalence of  
76 23.7%) but not in swamp deer. Sequences (lengths between 430-476 bp) were more than 99.5%  
77 identical (maximum two mismatches) to *A. phagocytophilum* strain HZ (GenBank accession  
78 number NR\_076399). Sequences from eleven amplicons (367 to 476 bp) were identical, with 99.8%  
79 identities with *Ralstonia pickettii* (GenBank accession number CP001644). Three identical  
80 sequences from two red deer and one swamp deer (3/66 - infection rate 4.5%) gave the highest  
81 identities with “*Candidatus Anaplasma mediterraneum*” sequence (KY498330), described as a  
82 potentially new *Anaplasma* species infecting sheep in Corsica [5] (table 2). Other genetic markers  
83 often used to identify *Anaplasma* species were then tested to further characterize this *Anaplasma*  
84 species never described in deer.

85 ***Further molecular characterization of the new Anaplasma spp. from deer in France***

86 Two *16S* rRNA identical sequences were obtained from red and swamp deer blood samples. They  
87 had similarities of more than 99.6% with numerous *16S* rRNA *Anaplasma capra* sequences  
88 deposited in GenBank. These sequences were obtained from sheep, goat, human blood and ticks  
89 from China, as well as from cattle, sika deer, Japanese serows and ticks from Japan. Sequence  
90 similarities with other known *Anaplasma 16S* rRNA sequences were lower than 99% (table 2).

91 As *Anaplasma capra groEL* and *gltA* sequences were also deposited in GenBank, we  
92 amplified and sequenced these genes from our deer blood samples to better characterize this new  
93 *Anaplasma*. The three *groEL* *Anaplasma* sequences from deer were identical and identity rates  
94 ranged from 91.4 to 97.7% with the *A. capra groEL* sequences from China and Japan available in  
95 GenBank (table 2). The similarities with *groEL* sequences from other related *Anaplasma* species (*A.*  
96 *centrale*, *A. marginale*, *A. platys*, *A. phagocytophilum* and *A. ovis*) fell under 84%. The three *gltA*  
97 *Anaplasma* sequences from deer differed by one nucleotide. The identity rates of the longest  
98 sequence (729 bp) ranged from 87.9 to 98% with *A. capra gltA* sequences from Japan and China.  
99 They were lower than 75% (61.4 to 74.6%) with *gltA* sequences from other *Anaplasma* species  
100 (table 2). All these data confirmed the identity of the *Anaplasma* from French deer as belonging to  
101 the *A. capra* species.

102 Partial sequences of the *16S* rRNA, *23S* rRNA, *groEL* and *gltA* from *A. capra* identified  
103 from the swamp deer and one red deer were deposited in GenBank (accession numbers MH084717-  
104 MH084724 with details in table 2).

105 ***Persistence of A. capra***

106 The persistence of deer infection by *A. capra* was analyzed by sampling blood from one of the two  
107 infected red deer four months after the initial detection of this unexpected bacterial species. We  
108 detected *A. capra*, with *23S* rRNA, *16S* rRNA, *groEL* and *gltA* sequences 100% identical to the first  
109 identified *A. capra*, with the same distinct nucleotide in the *gltA* sequence as characterized 4 months  
110 earlier.

111

112 **Discussion**

113 For about 40% of the positive conventional Anaplasmataceae spp. specific semi-nested  
114 PCRs, sequences indicated amplification of *Ralstonia pickettii* 23S rRNA, highlighting a lack of  
115 specificity of the semi-nested PCR used. As some of our negative controls were also positive, we  
116 decided to sequence them and sequences corresponding also to *Ralstonia pickettii* were found. As  
117 this bacteria is a frequent contaminant of all kind of solutions, including ultrapure water [6], our  
118 results most probably correspond to *R. pickettii* contamination of the solutions we used for  
119 extraction or PCR.

120 In this survey, we detected two *Anaplasma* species infecting deer. *A. phagocytophilum* was  
121 detected with a rather moderate prevalence (23.7%) in red deer only. Prevalence of *A.*  
122 *phagocytophilum* infection in wild red deer in Europe is highly variable, from 1.5% in Austria,  
123 10.9% in Portugal, 40-75% in Italy, 80.8% in Spain, to 97.9 to 100% in central Europe (respectively  
124 in Slovakia and Hungary) [7-13]. Captive deer are probably less prone to tick bites compared to  
125 wild ones, due to grazing areas management. This result indicates anyway the contact of red deer  
126 with ticks and the transmission of *A. phagocytophilum* in the Reserve. Swamp deer were found  
127 uninfected with *A. phagocytophilum*, a result which could be attributed to the low number of  
128 animals analyzed in the case of a low infection rate (7). There are no data about tick-transmitted  
129 pathogens for this endangered species, so the susceptibility of swamp deer to *A. phagocytophilum* is  
130 unknown. A recently described *Anaplasma* species, *A. capra* was detected and identified in both deer  
131 species, with a much lower infection rate (4.5%). *A. capra* has already been detected in various  
132 ruminant hosts (sheep, goats, cattle, sika deer, Japanese serows) but its localization was up to now  
133 geographically restricted to China and Japan [14-17]. Human infection by this newly-described  
134 species has been reported in northeast China, leading to patients hospitalisation [2]. The detection  
135 and characterization of *A. capra* based on several molecular markers in our study represents the first  
136 evidence of this potentially new zoonotic species in Europe (France) in two new hosts, red deer and

137 swamp deer. Species assignment to *A. capra* was based on *16S* rRNA homologies higher than 99%  
138 [18].

139 The *23S* rRNA sequence from *A. capra* described in our study blasted with an unknown *Anaplasma*  
140 species proposed as “*Candidatus Anaplasma mediterraneum*” from sheep in Corsica (France)[5].

141 Whether “*Candidatus Anaplasma mediterraneum*” corresponds in fact to *A. capra* could not be  
142 determined, as the only other marker used in this study is *rpoB*, whereas we as most authors used a  
143 combination of *16S* rRNA, *groEL*, *gltA* and *msp4* sequences to identify and characterize *Anaplasma*  
144 *capra* [2, 15-17, 19-21].

145

146 We have detected *A. capra* in three different deer since 2015. The first infected and detected  
147 red deer was a male originating from France (Theix) while the two others (red deer and swamp  
148 deer) detected in 2017 and 2018 were both born inside the Park. Acquisition of a locally transmitted  
149 *A. capra* is therefore probable for these two deer, even if *A. capra* may have been originally  
150 introduced into the Park from an external source. The epidemiological cycle of *A. capra* seems  
151 therefore to be completed locally. The low prevalence of infected deer in the Park might be due to  
152 the introduction being recent. Ticks are the main vectors for *Anaplasma* species even if other  
153 transmission routes have been described for some species (blood-sucking flies and transplacental  
154 transmissions) [1]. Although *A. capra* has been detected in several tick species, *Ixodes persulcatus*  
155 [2], *Rhipicephalus microplus* [19], *Haemaphysalis longicornis* [15,20] and *Haemaphysalis*  
156 *qinghaiensis* [21], vectorial competence has not been proven yet. As most of these tick species are  
157 not present in France, another tick species may be responsible for *A. capra* transmission in France.  
158 The “Réserve de la Haute Touche” is located in a forested preserved area suitable for ticks and ticks  
159 are commonly found feeding on the animals as well as questing on the vegetation (not shown).  
160 Vector identification and vectorial competence remain to be elucidated.

161 In this study, we demonstrated the presence in France of the new species *A. capra* on two  
162 new hosts. New studies are required, to examine its zoonotic ability, as non-zoonotic genetic

163 variants may exist as described in the case of *A. phagocytophilum* [1,3]. Diagnostic methods,  
164 especially molecular ones, should take into account the potential infection of animals and humans  
165 with this species, as molecular tools are often designed to specifically detect *A. phagocytophilum*.  
166 To improve our knowledge on the epidemiological cycle of this bacterium in France, the vector tick  
167 species should be identified, in order to evaluate the risks of transmission to humans. Deer could  
168 therefore be considered as a potential reservoir for *A. capra*.

169

#### 170 **Data Availability Statement**

171 Gene sequences are available in GenBank under accession numbers MH084717-MH084724.

#### 172 **Competing interest**

173 All authors report no conflicts of interest relevant to this article. There was no external funding for  
174 the study.

#### 175 **Acknowledgements**

176 Special thanks go to Alice Brunet, Héloïse Duchêne, Emmanuel Maréchal and Christophe Jubert for  
177 handling the deer and for their help in this survey as well as to the entire staff of the Zoological Park  
178 of “La Haute Touche” for their care of the animals. Roland Simon is also acknowledged for making  
179 this study possible.

180

#### 181 **Author Contributions**

182 **Conceptualization:** Laurence Malandrin, Katia Ortiz

**Formal Analysis :** Maggy Jouglin, Laurence Malandrin

**Funding Acquisition:** Maggy Jouglin, Nathalie de la Cotte, Laurence Malandrin

**Investigation:** Barbara Blanc, Maggy Jouglin, Nathalie de la Cotte

**Project Administration:** Barbara Blanc, Katia Ortiz, Laurence Malandrin

**Resources:** Katia Ortiz, Barbara Blanc, Nathalie de la Cotte

**Supervision:** Katia Ortiz, Laurence Malandrin

**Visualization:** Katia Ortiz, Laurence Malandrin



**Writing – Original Draft Preparation:** Maggy Jouglin, Laurence Malandrin

**Writing – Review & Editing:** Barbara Blanc, Maggy Jouglin, Katia Ortiz, Nathalie de la Cotte, Laurence Malandrin

183

184

185 **References**

- 186 1. Battilani M, De Arcangeli S, Balboni A, Dondi F. Genetic diversity and molecular epidemiology  
187 of *Anaplasma*. Infect Genet Evol. 2017;49:195-211. doi: 10.1016/j.meegid.2017.01.021.
- 188 2. Li H, Zheng YC, Ma L, Jia N, Jiang BG, Jiang RR, et al. Human infection with a novel tick-borne  
189 *Anaplasma* species in China: a surveillance study. Lancet Infect Dis. 2015;15:663-70. doi:  
190 10.1016/S1473-3099(15)70051-4.
- 191 3. Jouglin M, Chagneau S, Faille F, Verheyden H, Bastian S, Malandrin L. Detecting and  
192 characterizing mixed infections with genetic variants of *Anaplasma phagocytophilum* in roe deer  
193 (*Capreolus capreolus*) by developing an *ankA* cluster-specific nested PCR. Parasit Vectors.  
194 2017;10:377. doi: 10.1186/s13071-017-2316-0.
- 195 4. Dahmani M, Davoust B, Benterki MS, Fenollar F, Raoult D, Mediannikov O. Development of a  
196 new PCR-based assay to detect Anaplasmataceae and the first report of *Anaplasma*  
197 *phagocytophilum* and *Anaplasma platys* in cattle from Algeria. Comp Immunol Microbiol Infect  
198 Dis. 2015;39:39-45. doi: 10.1016/j.cimid.2015.02.002.
- 199 5. Dahmani M, Davoust B, Tahir D, Raoult D, Fenollar F, Mediannikov O. Molecular investigation  
200 and phylogeny of *Anaplasmataceae* species infecting domestic animals and ticks in Corsica, France.  
201 Parasit Vectors. 2017;10:302. doi: 10.1186/s13071-017-2233-2.
- 202 6. Ryan MP, Pembroke JT, Adley CC. *Ralstonia pickettii*: a persistent gram-negative nosocomial  
203 infectious organism. J Hosp Infect. 2006;62(3):278-84.
- 204 7. Cézanne R, Mrowietz N, Eigner B, Duscher GG, Glawischnig W, Fuehrer HP. Molecular analysis  
205 of *Anaplasma phagocytophilum* and *Babesia divergens* in red deer (*Cervus elaphus*) in Western  
206 Austria. Mol Cell Probes. 2017;31:55-58. doi: 10.1016/j.mcp.2016.07.003.

- 207 8. Pereira A, Parreira R, Nunes M, Casadinho A, Vieira ML, Campino L, Maia C. Molecular  
208 detection of tick-borne bacteria and protozoa in cervids and wild boars from Portugal. *Parasit*  
209 *Vectors*. 2016;9:251. doi: 10.1186/s13071-016-1535-0.
- 210 9. Ebani VV, Rocchigiani G, Bertelloni F, Nardoni S, Leoni A, Nicoloso S, Mancianti F. Molecular  
211 survey on the presence of zoonotic arthropod-borne pathogens in wild red deer (*Cervus elaphus*).  
212 *Comp Immunol Microbiol Infect Dis*. 2016;7:77-80. doi: 10.1016/j.cimid.2016.06.003.
- 213 10. Di Domenico M, Pascucci I, Curini V, Cocco A, Dall'Acqua F, Pompili C, Cammà C. Detection  
214 of *Anaplasma phagocytophilum* genotypes that are potentially virulent for human in wild ruminants  
215 and *Ixodes ricinus* in Central Italy. *Ticks Tick Borne Dis*. 2016;7:782-787. doi:  
216 10.1016/j.ttbdis.2016.03.012.
- 217 11. García-Pérez AL, Oporto B, Espí A, del Cerro A, Barral M, Povedano I, Barandika JF, Hurtado  
218 A. Anaplasmataceae in wild ungulates and carnivores in northern Spain. *Ticks Tick Borne Dis*.  
219 2016;7(2):264-9. doi: 10.1016/j.ttbdis.2015.10.019.
- 220 12. Kazimírová M, Hamšíková Z, Špitalská E, Minichová L, Mahríková L, Caban R, et al. Diverse  
221 tick-borne microorganisms identified in free-living ungulates in Slovakia. *Parasit Vectors*.  
222 2018;11:495. doi: 10.1186/s13071-018-3068-1.
- 223 13. Hornok S, Sugár L, Fernández de Mera IG, de la Fuente J, Horváth G, Kovács T, et al. Tick- and  
224 fly-borne bacteria in ungulates: the prevalence of *Anaplasma phagocytophilum*, haemoplasmas and  
225 rickettsiae in water buffalo and deer species in Central Europe, Hungary. *BMC Vet Res*.  
226 2018;14:98. doi: 10.1186/s12917-018-1403-6.
- 227 14. Inokuma H, Terada Y, Kamio T, Raoult D, Brouqui P. Analysis of the 16S rRNA gene sequence  
228 of *Anaplasma centrale* and its phylogenetic relatedness to other *Ehrlichiae*. *Clin Diagn Lab*  
229 *Immunol*. 2001;8:241-4.
- 230 15. Kawahara M, Rikihisa Y, Lin Q, Isogai E, Tahara K, Itagaki A, et al. Novel genetic variants of  
231 *Anaplasma phagocytophilum*, *Anaplasma bovis*, *Anaplasma centrale*, and a novel *Ehrlichia* sp. in  
232 wild deer and ticks on two major islands in Japan. *Appl Environ Microbiol*. 2006;72:1102-9.

- 233 16. Sato M, Nishizawa I, Fujihara M, Nishimura T, Matsubara K, Harasawa R. Phylogenetic  
234 analysis of the 16S rRNA gene of *Anaplasma* species detected from Japanese serows (*Capricornis*  
235 *crispus*). J Vet Med Sci. 2009;71:1677-9.
- 236 17. Yang J, Liu Z, Niu Q, Liu J, Han R, Guan G, Hassan MA, Liu G, Luo J, Yin H. A novel zoonotic  
237 *Anaplasma* species is prevalent in small ruminants: potential public health implications. Parasit  
238 Vectors. 2017;10:264. doi: 10.1186/s13071-017-2182-9.
- 239 18. Clarridge JE III. Impact of 16S rRNA gene sequence analysis for identification of bacteria on  
240 clinical microbiology and infectious diseases. Clin Microbiol Rev. 2004;17:840-862.
- 241 19. Lu M, Tian JH, Yu B, Guo WP, Holmes EC, Zhang YZ. Extensive diversity of rickettsiales  
242 bacteria in ticks from Wuhan, China. Ticks Tick Borne Dis. 2017;8:574-580. doi:  
243 10.1016/j.ttbdis.2017.03.006.
- 244 20. Sun XF, Zhao L, Wen HL, Luo LM, Yu XJ. *Anaplasma* species in China. Lancet Infect Dis.  
245 2015;15:1263-4. doi: 10.1016/S1473-3099(15)00377-1.
- 246 21. Yang J, Liu Z, Niu Q, Liu J, Han R, Liu G, et al. Molecular survey and characterization of a  
247 novel *Anaplasma* species closely related to *Anaplasma capra* in ticks, northwestern China. Parasit  
248 Vectors. 2016;9:603.
- 249

250 **Table 1**

251 Nucleotide sequence of primers used in the study

| Target gene  | Primer name  | Sequence (5'-3')                 | Amplicon length | Reference  |
|--------------|--------------|----------------------------------|-----------------|------------|
| 23S rRNA     | Ana23S-212F  | ATAAGCTGCGGGGAATTGTC             | 696 bp          | [4]        |
|              | Ana23S-908R  | TGGAGGACCGAACCTGTTAC             |                 | [4]        |
|              | Ana23S-212F  | ATAAGCTGCGGGGAATTGTC             | 541 bp          | [4]        |
|              | Ana23S-753R  | GTGACAGCGTACCTTTTGCA             |                 | [4]        |
| 16S rRNA     | Ana16Sup1    | CGGGTGAGTAATGCATAGGA             | 1089 bp         | This study |
|              | Ana16Sdo3    | TAGCACGTGTGTAGCCCAC              |                 | This study |
|              | Ana16sIntup1 | AACTCCGTGCCAGCAGCCGCG            | 581 bp          | This study |
|              | Ana16Sdo1    | CCCAACATCTCACGACAC               |                 | This study |
| <i>gltA</i>  | Outer-F      | GCGATTTTAGAGTGYGGAGATTG          | 1077 bp         | [2]        |
|              | Outer-R      | TACAATACCGGAGTAAAAGTCAA          |                 | [2]        |
|              | Inner-F      | GGGTTCTGTCC <u>ACT</u> GCTGCGTG  | 793 bp          | [2]*       |
|              | Inner-R      | TTGGATCGTA <u>ATT</u> CTTGTAGACC |                 | [2]*       |
| <i>groEL</i> | Ac-groEL-F1  | GCGAGGCGTTAGACAAGTCCATT          | 1264 bp         | [2]        |
|              | Ac-groEL-R3  | TCCAGAGATGCGAGCGTGTATAG          |                 | [2]        |
|              | Ac-groEL-F2  | TGCACTGCTGGTCCAAAGGGGCT          | 1087 bp         | This study |
|              | Ac-groEL-R2  | CAACTTCGCTAGAGCCGCCAACC          |                 | This study |

253 • Modified from [2]\*, in accordance to GenBank accession number KM206274 sequence

254

255 **Table 2**

256

257 Sequence lengths and identity rates with *Anaplasma spp.* sequences

258

| Gene         | Sequence lengths                                      | GenBank accession numbers | Reference organisms and sequences                                                                                                                                                                    | Identity rate                                                     |
|--------------|-------------------------------------------------------|---------------------------|------------------------------------------------------------------------------------------------------------------------------------------------------------------------------------------------------|-------------------------------------------------------------------|
| 23S rRNA     | CEL15 - 367 bp<br>CEL17 - 506 bp<br>DVC 17 - 515 bp   | MH084724<br>MH084723      | <i>Cand. A. mediterraneum</i> KY498330<br><i>A. ovis</i> KM021411<br><i>A. centrale</i> NR-076686<br><i>A. marginale</i> KY498332<br><i>A. platys</i> KM021412<br><i>A. phagocytophilum</i> KM021418 | <b>99.6 %</b><br>95.0%<br>94.6%<br>93.8%<br>91.6%<br>90.8%        |
| 16S rRNA     | CEL17 - 531 bp<br>DVC 17 - 518 bp                     | MH084721<br>MH084722      | <i>A. capra</i> KM206273 - MF066917<br><i>A. marginale</i> AF414874<br><i>A. centrale</i> AF318944<br><i>A. ovis</i> AJ633049<br><i>A. phagocytophilum</i> NR-044762<br><i>A. platys</i> AY077619    | <b>99.6% - 99.8%</b><br>98.7%<br>98.5%<br>98.3%<br>96.4%<br>96.2% |
| <i>groEL</i> | CEL15 - 559 bp<br>CEL17 - 1008 bp<br>DVC 17 - 1087 bp | MH084718<br>MH084717      | <i>A. capra</i> KM206275 - AB454078<br><i>A. marginale</i> AF414864<br><i>A. centrale</i> EF520691<br><i>A. ovis</i> AF441131<br><i>A. platys</i> AY044161<br><i>A. phagocytophilum</i> JF494833     | <b>91.4% - 97.7%</b><br>83.2%<br>83.2%<br>83.2%<br>77.5%<br>76.2% |
| <i>gltA</i>  | CEL15 - 729 bp<br>CEL17 - 707 bp<br>DVC 17 - 725 bp   | MH084720<br>MH084719      | <i>A. capra</i> KM206274 - MG940872<br><i>A. marginale</i> AF304139<br><i>A. ovis</i> PKOE01000003<br><i>A. centrale</i> CP001759<br><i>A. phagocytophilum</i> AY464132<br><i>A. platys</i> EU516387 | <b>87.9% - 98%</b><br>74.6%<br>74.2%<br>73.3%<br>65.4%<br>61.4%   |

259 CEL : *Cervus elaphus*

260 DVC : *Rucervus duvaucelii*

261
